# Supplementary material for: A waste biomass derived hard carbon as a high-performance anode material for sodium-ion batteries
Source: Royal Society of Chemistry journal article supplement (doi:10.1039/c6ta04877c), 2016-01-01
Supplement: c6ta04877c1.pdf [file c6ta04877c1.pdf]

## Supporting Information for

### **A waste biomass derived hard carbon as high-performance anode material for sodium-ion batteries**

Pin Liu, Yunming Li\*, Yong-Sheng Hu\*, Hong Li, Liquan Chen, Xuejie Huang

Key Laboratory for Renewable Energy, Beijing Key Laboratory for New Energy Materials and Devices, Beijing National Laboratory for Condensed Matter Physics, Institute of Physics, Chinese Academy of Sciences, Beijing 100190, China  
University of Chinese Academy of Sciences, Beijing 100049, China  
E-mail: [liym@iphy.ac.cn](mailto:liym@iphy.ac.cn), [yshu@iphy.ac.cn](mailto:yshu@iphy.ac.cn)

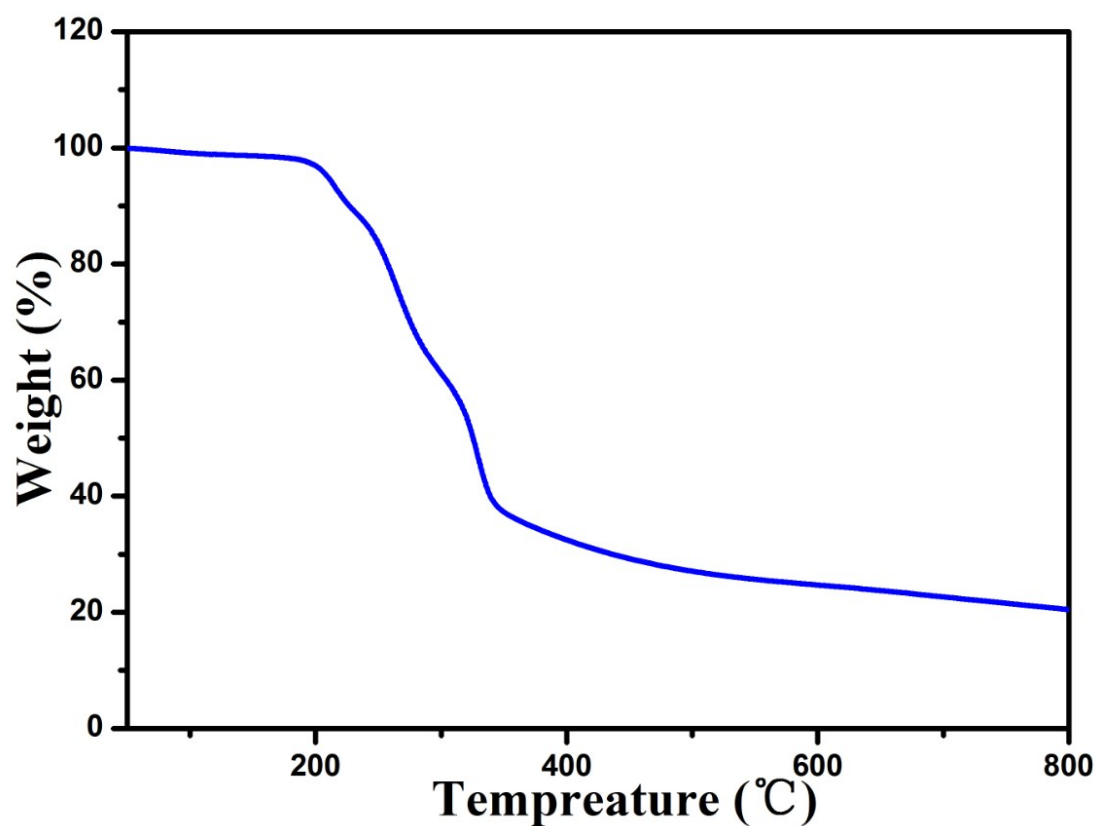

**Fig. S1** TGA data of corn cob at a heating rate of 5°C min<sup>-1</sup> under an Ar gas atmosphere.

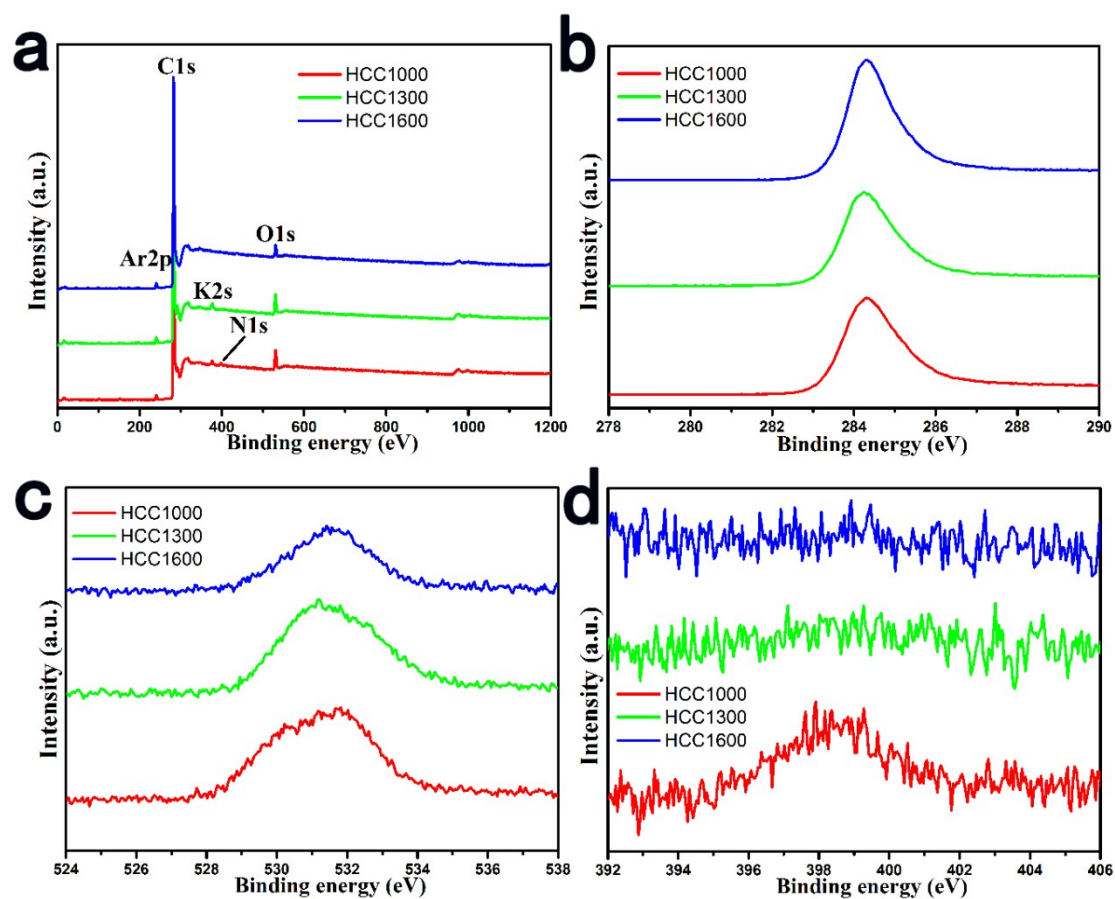

**Fig. S2** Evolution of XPS (a) whole spectra, (b) C 1s, (c) O 1s and (d) N 1s spectra with the increase of carbonization temperature.

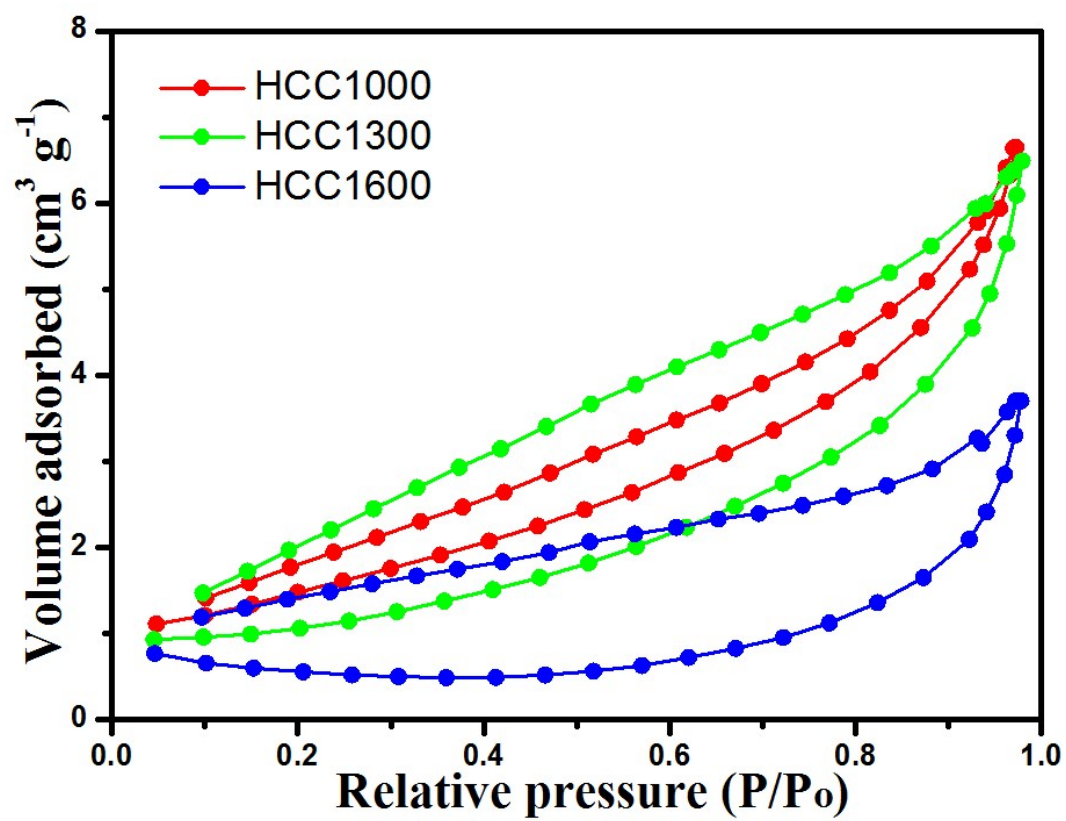

**Fig. S3** N<sub>2</sub> adsorption-desorption isothermal curves of HCC samples.
